# Supplementary material for: Goose Astrovirus in China: A Comprehensive Review
Source: MDPI journal article supplement (doi:10.3390/v14081759), 2022-08-12
Supplement: s1 [file s1]

**Table S1.** The reference AstV strains used in this study.

| Strains name                        | Hosts                  | GenBank accession no. | Collection date | Countries |
|-------------------------------------|------------------------|-----------------------|-----------------|-----------|
| TAstV/TX/00                         | Turkey                 | EU143850              | -               | USA       |
| -                                   | Turkey                 | NC_002470             | -               | USA       |
| TAstV/CA/00                         | Turkey                 | EU143844              | -               | USA       |
| ANV/CHN/BJCP510-2/2018              | Chicken                | MN732558              | 2018            | China     |
| DA93                                | Duck                   | FJ919228              | -               | China     |
| C-NGB                               | Duck                   | NC_012437             | 2008            | USA       |
| DA06                                | Duck                   | FJ919225              | -               | China     |
| CPH                                 | Duck                   | KJ020899              | 2013            | China     |
| CAstV/Poland/G059/2014              | Chicken                | KT886453              | 2014            | Poland    |
| GA2011                              | Chicken                | JF414802              | 2011            | USA       |
| CAstV/INDIA/ANAN D/2016             | Chicken                | KY038163              | 2016            | India     |
| 1                                   | Avian_nephritis        | HM029238              | 2009            | China     |
| SH10                                | Pigeon_avian_nephritis | HQ889774              | 2010            | China     |
| TAstV/MN/01                         | Turkey                 | EU143847              | -               | USA       |
| ZJLD                                | Goose                  | OK571389              | 2020            | China     |
| TZ03                                | Goose                  | MW353015              | 2019            | China     |
| HNNY0620                            | Goose                  | MZ367612              | 2020            | China     |
| HNXX-6/China/2020                   | Goose                  | MW592379              | 2020            | China     |
| HNSQ-6/China/2020                   | Goose                  | MW592378              | 2020            | China     |
| HNKF-1/China/2020                   | Goose                  | MW592377              | 2020            | China     |
| SDPD                                | Goose                  | MW345727              | 2019            | China     |
| SCCD                                | Goose                  | MW340534              | 2019            | China     |
| AstV/SDTA                           | Goose                  | MN809622              | -               | China     |
| SDXT                                | Goose                  | MN399857              | -               | China     |
| AstV/SDPY/Goose/1116/17             | Goose                  | MH052598              | 2017            | China     |
| ZJC14                               | Goose                  | OK571391              | 2020            | China     |
| JRMS                                | Goose                  | OK571390              | 2020            | China     |
| JX01/China/2021                     | Goose                  | MZ576222              | 2021            | China     |
| AAstV/Goose/CHN/2019/DY-19          | Goose                  | MT708902              | 2019            | China     |
| XT1                                 | Goose                  | MW413813              | 2020            | China     |
| Astv/Goose/Guangdong/g/1810MFC/2018 | Goose                  | MN109957              | 2018            | China     |
| Astv/Goose/Guangdong/g/1808CCF/2018 | Goose                  | MN109956              | 2018            | China     |
| Astv/Goose/Guangdong/g/1803LZM/2018 | Goose                  | MN109955              | 2018            | China     |

|                     |       |          |      |  |       |
|---------------------|-------|----------|------|--|-------|
| Astv/Goose/Guangdon |       |          |      |  |       |
| g/1807LWG/2018      | Goose | MN109954 | 2018 |  | China |
| Astv/Goose/Guangdon |       |          |      |  |       |
| g/1812LMG/2018      | Goose | MN127959 | 2018 |  | China |
| Astv/Goose/Guangdon |       |          |      |  |       |
| g/1811LHC/2018      | Goose | MN127958 | 2018 |  | China |
| Astv/Goose/Guangdon |       |          |      |  |       |
| g/1811DWM/2018      | Goose | MN127957 | 2018 |  | China |
| Astv/Goose/Guangdon |       |          |      |  |       |
| g/1811CFC/2018      | Goose | MN127956 | 2018 |  | China |
| Astv/Goose/Guangdon |       |          |      |  |       |
| g/1901SM/2019       | Goose | MN127955 | 2019 |  | China |
| Astv/Goose/Guangdon |       |          |      |  |       |
| g/1901TBF/2019      | Goose | MN127954 | 2019 |  | China |
| Astv/Goose/Guangdon |       |          |      |  |       |
| g/1901LNC/2019      | Goose | MN127953 | 2019 |  | China |
| Astv/Goose/Guangdon |       |          |      |  |       |
| g/1812GXG/2018      | Goose | MN127952 | 2018 |  | China |
| Astv/Goose/Guangdon |       |          |      |  |       |
| g/1811TS/2018       | Goose | MN127951 | 2018 |  | China |
| Astv/Goose/Guangdon |       |          |      |  |       |
| g/1807LZQ/2018      | Goose | MN103532 | 2018 |  | China |
| AstV/HB02/Goose/031 |       |          |      |  |       |
| 0/19                | Goose | MN307119 | 2019 |  | China |
| AstV/HB01/Goose/012 |       |          |      |  |       |
| 3/19                | Goose | MN307118 | 2019 |  | China |
| AstV/HN02/Goose/111 |       |          |      |  |       |
| 9/18                | Goose | MN307117 | 2018 |  | China |
| AstV/AH02/Goose/071 |       |          |      |  |       |
| 5/18                | Goose | MN307116 | 2018 |  | China |
| AstV/AH01/Goose/051 |       |          |      |  |       |
| 2/18                | Goose | MN307115 | 2018 |  | China |
| AstV/HN01/Goose/010 |       |          |      |  |       |
| 3/18                |       | MN307114 | 2018 |  | China |
| AstV/HBXG/Goose/20  |       |          |      |  |       |
| 19                  | Goose | MN894548 | 2019 |  | China |
| AHAU5               | Goose | MN428645 | 2018 |  | China |
| AHAU4               | Goose | MN428644 | 2018 |  | China |
| AHAU3               | Goose | MN428643 | 2018 |  | China |
| GD_AHAU2            | Goose | MN428642 | 2018 |  | China |
| AHAU1               | Goose | MN428641 | 2018 |  | China |
| AstV/Goose/2018/HLJ |       |          |      |  |       |
| 01                  | Goose | MN175321 | 2018 |  | China |
| GTF-07              | Goose | MN068024 | 2018 |  | China |

|                    |       |          |      |       |
|--------------------|-------|----------|------|-------|
| GTF-04             | Goose | MN068023 | 2018 | China |
| XX                 | Goose | MN337323 | 2018 | China |
| JSHA               | Goose | MK125058 | 2016 | China |
| AstV/Goose/CXZ/18  | Goose | MH807626 | 2018 | China |
| HN1G               | Goose | KY807085 | 2014 | China |
| AHDY               | Goose | MH410610 | 2014 | China |
| FLX                | Goose | KY271027 | 2014 | China |
| GD                 | Goose | MG934571 | 2017 | China |
| FLX                | Goose | KY271027 | 2014 | China |
| HNU-CSZ2-2019      | Goose | MT934439 | 2019 | China |
| HNU-LYG3-2019      | Goose | MT934438 | 2019 | China |
| HNU-LYG2-2019      | Goose | MT934437 | 2019 | China |
| AAstV/Goose/CHN/20 |       |          |      |       |
| 17/SD01            | Goose | MF772821 | 2017 | China |
