# Supplementary material for: Goose Astrovirus in China: A Comprehensive Review
Source: MDPI journal article supplement (doi:10.3390/v14081759), 2022-08-12
Supplement: s1 [file s1]

**Table S2.** The breakpoint positions of recombination events in our study.

| Breakpoint Positions in Recombinant Sequence |      |                      |                         |                         | Detection Methods |           |            |           |           |           |         |      |           |
|----------------------------------------------|------|----------------------|-------------------------|-------------------------|-------------------|-----------|------------|-----------|-----------|-----------|---------|------|-----------|
| Begin                                        | End  | Recombinant Sequence | Minor Parental Sequence | Major Parental Sequence | RDP               | GENECONV  | Bootscan   | Maxchi    | Chimaera  | SiScan    | PhylPro | LARD | 3Seq      |
| 3330                                         | 5444 | TZ03                 | SCCD                    | FLX                     | 3.333E-23         | 1.179E-38 | 2.284 E-50 | 2.631E-12 | 4.845E-05 | 7.945E-53 | NS      | NS   | 4.913E-52 |

**Note.** Minor Parent = Parent contributing the smaller fraction of sequence. Major Parent = Parent contributing the larger fraction of sequence. NS = No significant *P*-value was recorded for this recombination event using this method.
